# Supplementary material for: Inverted thermal annealing of perovskite films: a method for enhancing photovoltaic device efficiency
Source: Royal Society of Chemistry journal article supplement (doi:10.1039/c6ra07497a), 2016-01-01
Supplement: c6ra07497a1.pdf [file c6ra07497a1.pdf]

## Supporting information

### **Inverted thermal annealing of perovskite films: a method for enhancing photovoltaic device efficiency**

Guohua Dong,<sup>a,b</sup> Yulin Yang,<sup>\*a</sup> Li Sheng,<sup>a</sup> Debin Xia,<sup>a</sup> Ting Su,<sup>a</sup> Ruiqing Fan,<sup>\*a</sup> Yan Shi<sup>a</sup> and Junhai Wang<sup>a</sup>

<sup>a</sup> School of Chemistry and Chemical Engineering, Harbin Institute of Technology, Harbin 150001, P. R. China. E-mail: ylyang@hit.edu.cn and fanruiqing@hit.edu.cn; Fax: +86-451-86418270.

<sup>b</sup> College of Chemistry and Chemical Engineering, Qiqihar University, Qiqihar 161006, P .R. China.

\* Corresponding Author: E-mail: ylyang@hit.edu.cn and fanruiqing@hit.edu.cn; Fax: +86-451-86418270.

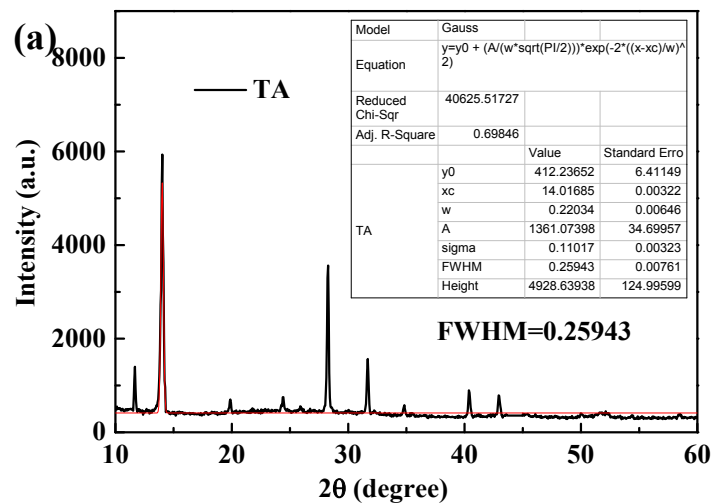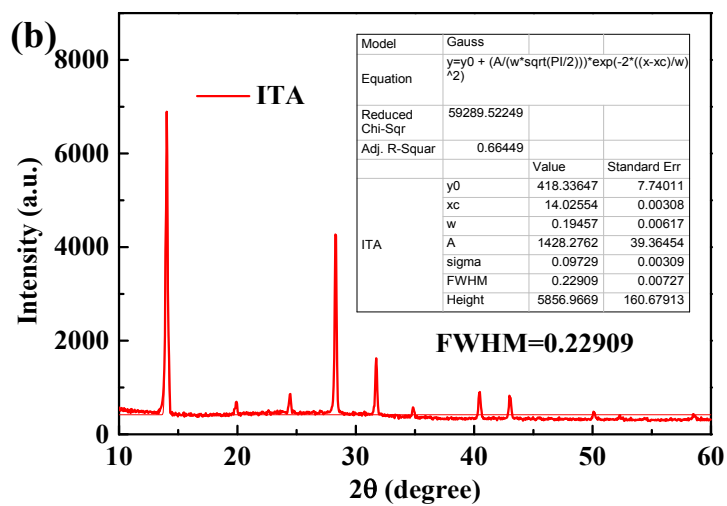

**Figure S1.** The FWHM results of the highest peak at 14.2° by fitting the original XRD datum of the perovskite films treated with TA (a) and ITA (b).

**Table S1.** EIS results of the PSCs treated with TA and ITA

| <b>Annealing</b> | <b>R<sub>s</sub></b><br><b>(ohm cm<sup>2</sup>)</b> | <b>R<sub>tr</sub></b><br><b>(ohm cm<sup>2</sup>)</b> | <b>R<sub>rec</sub></b><br><b>(ohm cm<sup>2</sup>)</b> |
|------------------|-----------------------------------------------------|------------------------------------------------------|-------------------------------------------------------|
| TA               | 2.26                                                | 5.64                                                 | 10.35                                                 |
| ITA              | 2.24                                                | 5.36                                                 | 10.71                                                 |
